# Supplementary material
Source: publisher figshare collection journal article supplement (https://acs.figshare.com/ndownloader/files/24021318)
Supplement: Supplementary file 1 [file 24021318]

**Biophysical insight into implications of PEG-400 on alpha-crystallin structure: Multi spectroscopic and microscopic approach**

Anas Shamsi<sup>1</sup>, Taj Mohammad<sup>1</sup>, Saleha Anwar<sup>1</sup>, Md. Imtaiyaz Hassan<sup>1</sup>, Faizan Ahmad<sup>1</sup>, Ikramul Hasan<sup>2</sup>, and Asimul Islam<sup>1,\*</sup>

<sup>1</sup>Center for Interdisciplinary Research in Basic Sciences, Jamia Millia Islamia, Jamia Nagar, New Delhi – 110025, India.

<sup>2</sup>Department of Basic Medical Science, Faculty of Applied Medical Sciences, Al-Baha University, Al-Baha, KSA

**\*Corresponding Author:**

**Dr. Asimul Islam,**  
**Associate Professor**

Member, National Academy of Sciences, NASI, India;

Centre for Interdisciplinary Research in Basic Sciences, Jamia Millia Islamia, New Delhi 110025

Email: [aislam@jmi.ac.in](mailto:aislam@jmi.ac.in)

Ph.: 0091-9312812

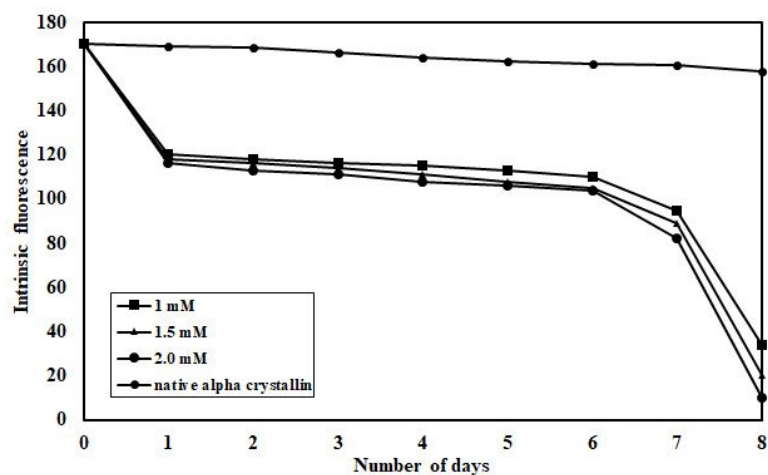

**Figure S1:** Relative intrinsic fluorescence of  $\alpha$ -crystallin in the presence of 1, 1.5 and 2 mM PEG-400 as a function of number of days (0-8). Native protein without PEG-400 is also depicted for a span of 8 days.

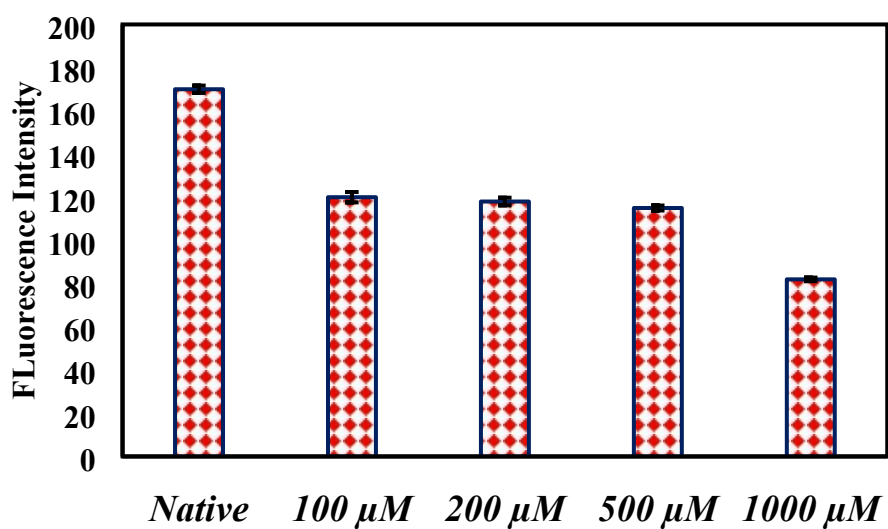

**Figure S2:** Relative intrinsic fluorescence as a function of PEG-400 concentrations.
